# Supplementary material for: Mother–Infant Co-Sleeping and Maternally Reported Infant Breathing Distress in the UK Millennium Cohort
Source: MDPI journal article supplement (doi:10.3390/ijerph17092985), 2020-04-25
Supplement: s1 [file s1]

## Supplementary Materials

Table S1. Correlations between logistic regression predictor variables.

Figure S1. Plots of relationships of all covariates with occurrence of breathing difficulties. Lines are Lowess smooth curves.

**Table S1.** Matrix of correlations for variables entered in logistic regression analysis.

| Variables           | (1)    | (2)    | (3)    | (4)    | (5)    | (6)    | (7)    | (8)    | (9)    | (10)  | (11)  |
|---------------------|--------|--------|--------|--------|--------|--------|--------|--------|--------|-------|-------|
| (1) bed co-sleep    | 1.000  |        |        |        |        |        |        |        |        |       |       |
| (2) Breast fed      | 0.051  | 1.000  |        |        |        |        |        |        |        |       |       |
| (3) Hosp. stay      | -0.024 | -0.017 | 1.000  |        |        |        |        |        |        |       |       |
| (4) Infant sex      | -0.023 | 0.004  | 0.013  | 1.000  |        |        |        |        |        |       |       |
| (5) Birthweight     | -0.023 | 0.028  | 0.145  | -0.106 | 1.000  |        |        |        |        |       |       |
| (6) Income score    | -0.104 | 0.249  | -0.001 | 0.003  | 0.082  | 1.000  |        |        |        |       |       |
| (7) Mo. Birth yr.   | -0.041 | 0.226  | 0.007  | 0.010  | 0.061  | 0.348  | 1.000  |        |        |       |       |
| (8) Inf. n. illness | 0.009  | 0.015  | -0.021 | -0.053 | -0.022 | 0.035  | -0.031 | 1.000  |        |       |       |
| (9) Mother educ.    | -0.013 | -0.238 | 0.022  | -0.010 | -0.038 | -0.343 | -0.259 | -0.015 | 1.000  |       |       |
| (10) Dad absent     | -0.093 | 0.174  | 0.003  | 0.007  | 0.063  | 0.321  | 0.290  | -0.001 | -0.128 | 1.000 |       |
| (11) Singleton      | -0.021 | -0.020 | -0.078 | 0.020  | -0.193 | -0.015 | 0.050  | -0.012 | -0.013 | 0.020 | 1.000 |

Y=1, breathing difficulty reported. Y=0, no breathing difficulty

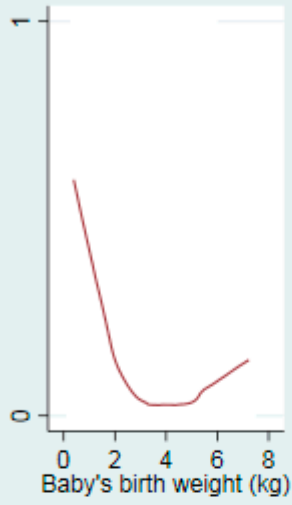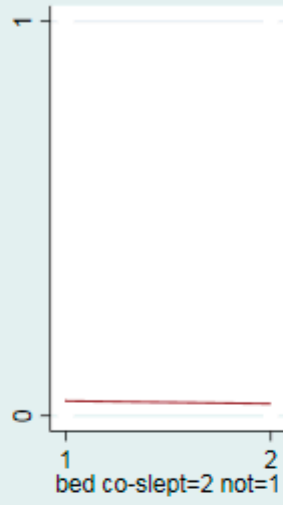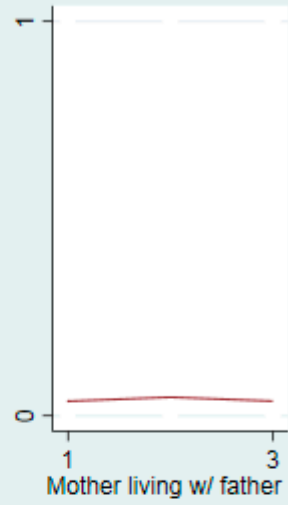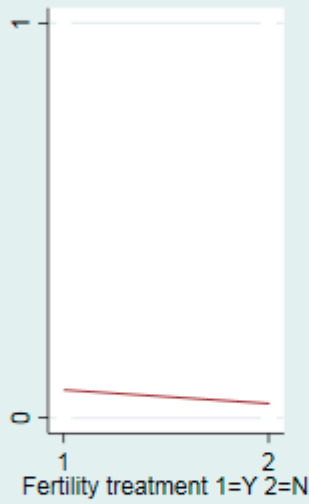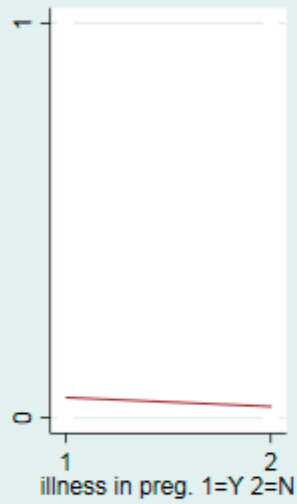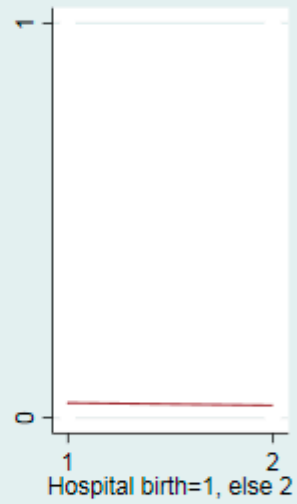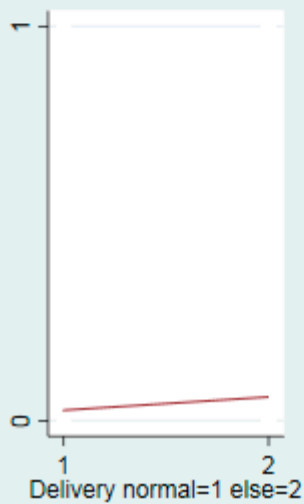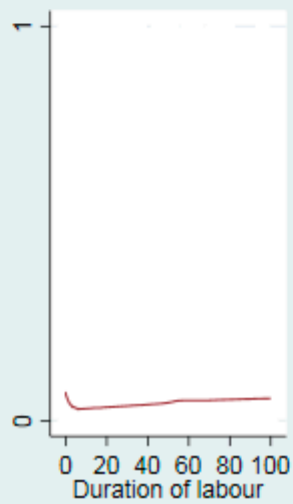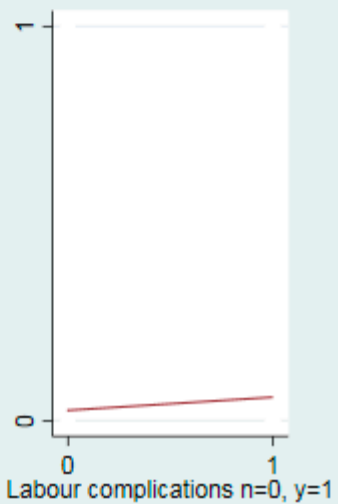

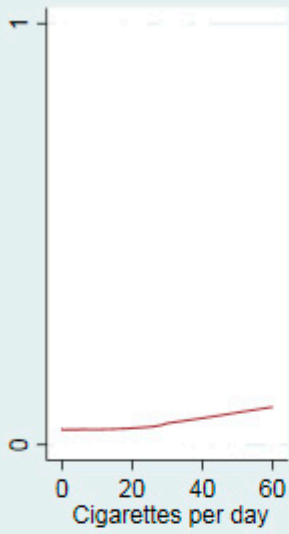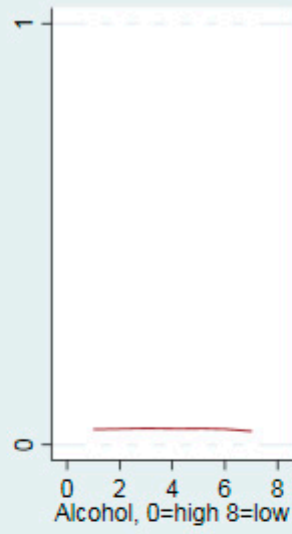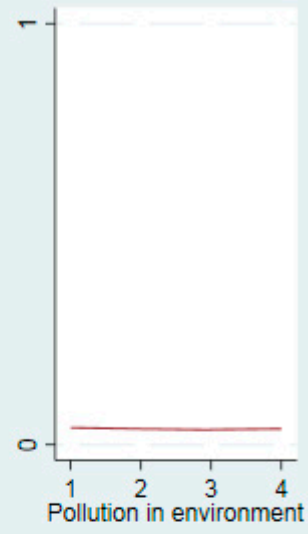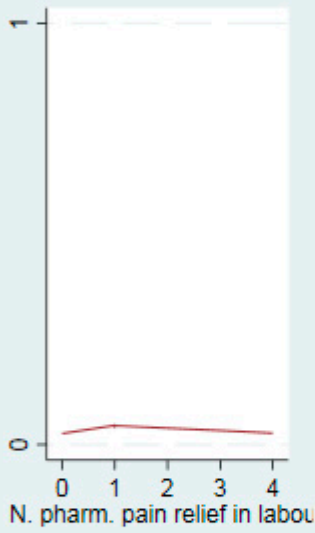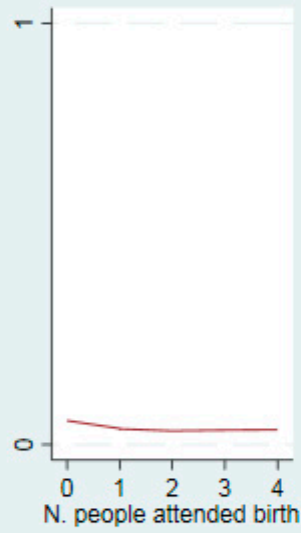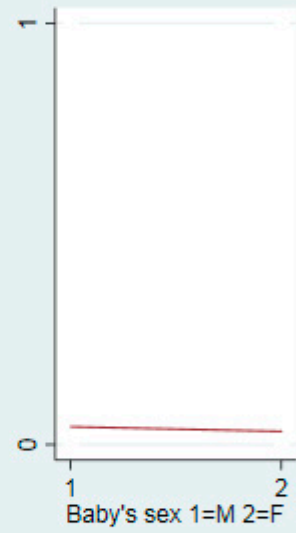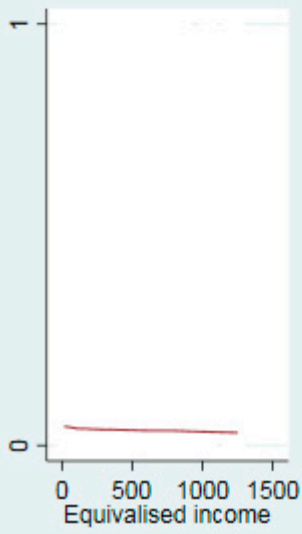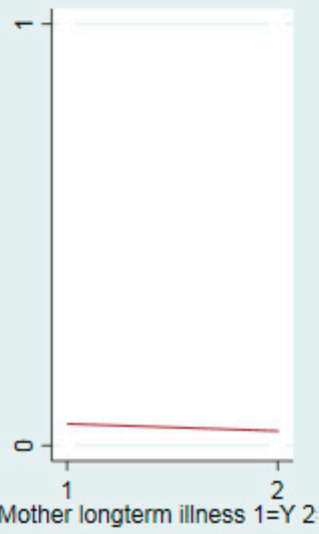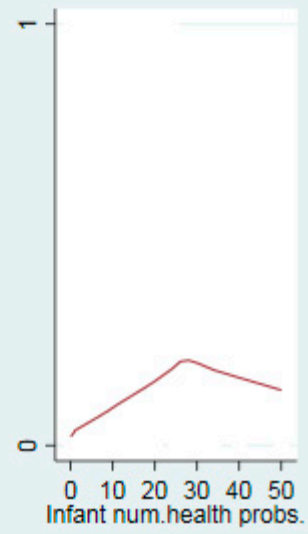

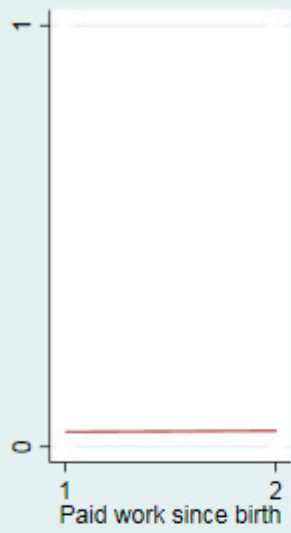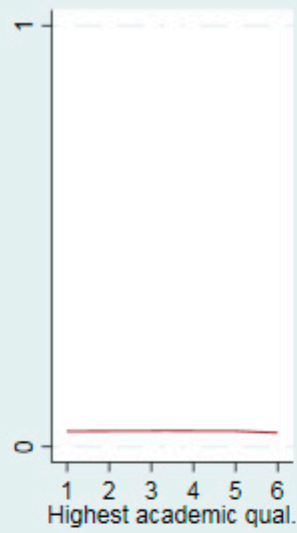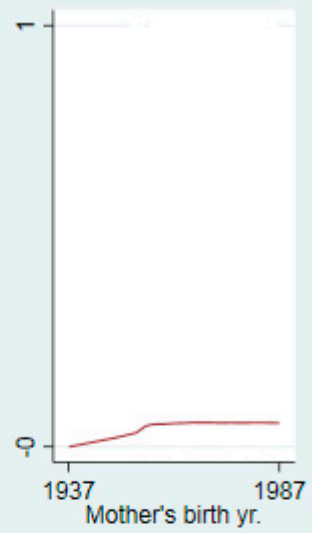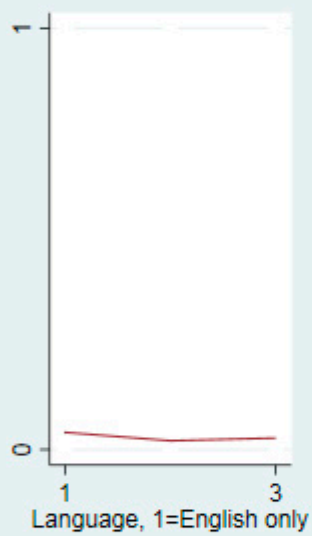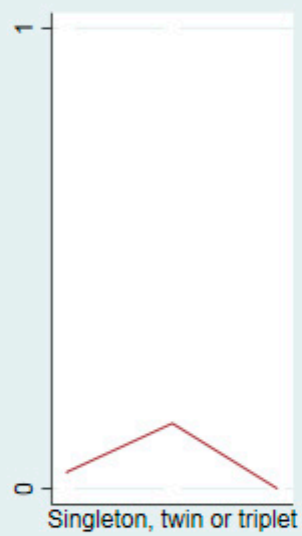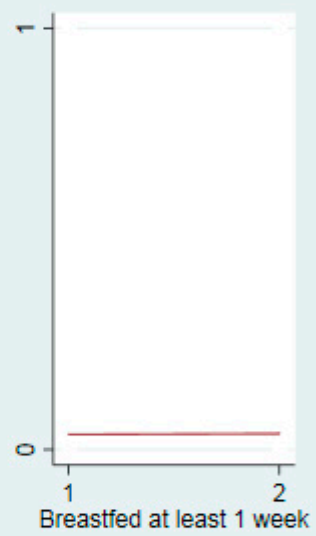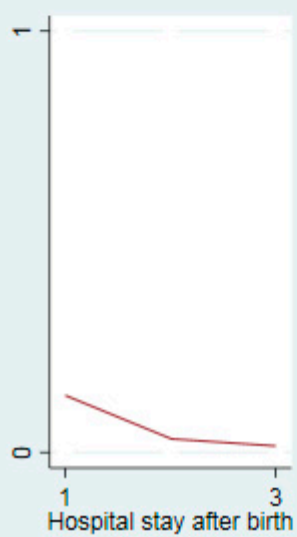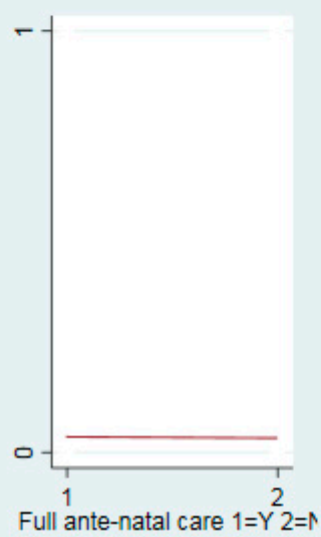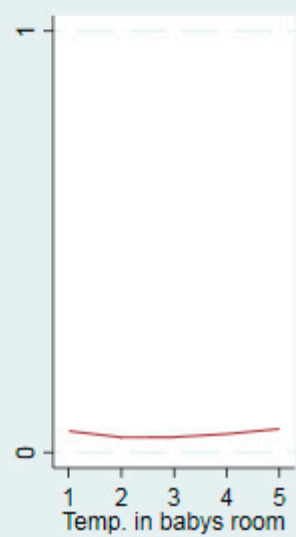

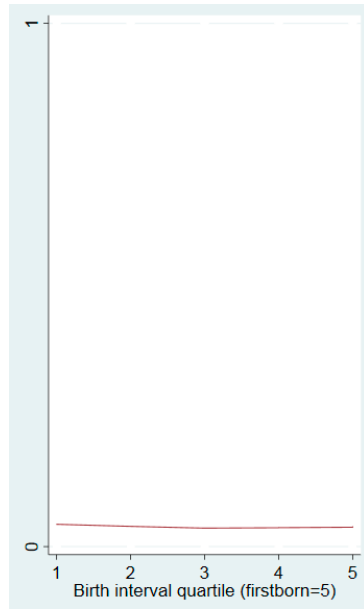

**Figure S1.** Plots of covariates with occurrence of breathing difficulties.
